# Supplementary material for: A Two-Way Proteome Microarray Strategy to Identify Novel Mycobacterium tuberculosis-Human Interactors
Source: PubMed Central journal article supplement (PMC6448480; doi:10.3389/fcimb.2019.00065), 2019-03-28
Supplement: Data_Sheet_1.pdf [file Data_Sheet_1.pdf]

*Supplementary Material*

**A Two-way Proteome Microarray Strategy to Identify Novel  
*Mycobacterium tuberculosis*-human Interactors**

**Tingming Cao<sup>1#</sup>, Lingna Lyu<sup>1#</sup>, Hongyan Jia<sup>1</sup>, Jinghui Wang<sup>1</sup>, Fengjiao Du<sup>1</sup>,  
Liping Pan<sup>1</sup>, Zihui Li<sup>1</sup>, Aiyong Xing<sup>1</sup>, Jing Xiao<sup>1</sup>, Yu Ma<sup>1</sup>, Zongde Zhang<sup>1\*</sup>**

1 Beijing Key Laboratory for Drug Resistant Tuberculosis Research, Beijing Tuberculosis and Thoracic Tumor Research Institute, Beijing Chest Hospital, Capital Medical University, Beijing, China.

# These authors contributed equally to this work.

\* **Correspondence:** Corresponding Author: [zzd417@ccmu.edu.com](mailto:zzd417@ccmu.edu.com)

# 1 Supplementary Figures and Tables

## 1.1 Supplementary Figures

| A       |        | B        |        | C        |        |        |
|---------|--------|----------|--------|----------|--------|--------|
| Protein | SNR534 | Protein  | SNR647 | Protein  | SNR534 | SNR647 |
| IKZF4   | 11.24  | C6orf166 | 7.62   | MAP2K5   | 16.05  | 54.80  |
| SOX10   | 10.97  | LDHA     | 7.11   | HOXB4    | 9.59   | 13.92  |
| IRF2    | 5.44   | LAPTM4A  | 6.69   | MTA2     | 8.33   | 3.66   |
| BARX2   | 4.47   | CYP39A1  | 6.39   | ZNF253   | 7.47   | 6.78   |
| ZFP91   | 3.64   | CSRP2BP  | 6.22   | NRF1     | 6.53   | 8.98   |
| GRM8    | 3.13   | PARVA    | 6.14   | OVOL1    | 6.32   | 7.02   |
| MBD2    | 2.98   | ITM2B    | 5.92   | INSM1    | 6.21   | 7.59   |
| PPARD   | 2.50   | CPA1     | 5.21   | ZNF700   | 6.01   | 7.86   |
| FOXD3   | 2.34   | SF3B2    | 4.92   | ZNF540   | 5.74   | 10.38  |
| ZNF70   | 2.18   | NDUFB6   | 4.92   | HOXB9    | 5.69   | 3.75   |
|         |        | BCL2L14  | 4.86   | HOXB5    | 4.97   | 3.67   |
|         |        | MBTPS1   | 4.77   | KIAA2018 | 4.96   | 5.68   |
|         |        | GNB1L    | 4.57   | ZNF343   | 4.63   | 8.33   |
|         |        | ACP1     | 3.78   | SRCAP    | 4.33   | 12.72  |
|         |        | PPCDC    | 3.65   | GMEB2    | 4.27   | 4.22   |
|         |        | MAPK3    | 3.62   | SMAD2    | 4.24   | 5.90   |
|         |        | FLJ20366 | 3.44   | ZNF23    | 4.23   | 3.72   |
|         |        | RFC4     | 3.27   | ZNF100   | 4.17   | 3.49   |
|         |        | GLO1     | 3.23   | ZNF425   | 3.98   | 4.02   |
|         |        | CD300LB  | 3.16   | ZNF557   | 3.97   | 4.16   |
|         |        | VPS8     | 3.12   | GLIS2    | 3.89   | 13.95  |
|         |        | SGCA     | 3.04   | SRY      | 3.72   | 2.06   |
|         |        | PCK2     | 2.79   | ZNF570   | 3.63   | 3.73   |
|         |        | BAT1     | 2.55   | ZBTB12   | 3.55   | 2.27   |
|         |        | CDX2     | 2.49   | FOXM1    | 3.52   | 2.19   |
|         |        | NFE2L2   | 2.43   | ZNF541   | 3.51   | 5.07   |
|         |        | SLC39A8  | 2.40   | DPRX     | 3.48   | 2.82   |
|         |        | HNF4A    | 2.31   | VENTX    | 3.47   | 3.45   |
|         |        | RORA     | 2.21   | RNF113B  | 3.40   | 4.53   |
|         |        | SOX4     | 2.20   | SP6      | 3.37   | 6.68   |
|         |        |          |        | ZNF337   | 3.33   | 3.31   |
|         |        |          |        | SMAD4    | 3.10   | 4.53   |
|         |        |          |        | ZNF699   | 2.92   | 3.51   |
|         |        |          |        | ZNF136   | 2.76   | 2.34   |
|         |        |          |        | TSC22D4  | 2.67   | 2.74   |
|         |        |          |        | IKZF3    | 2.62   | 3.00   |
|         |        |          |        | ESRRG    | 2.59   | 2.57   |
|         |        |          |        | ZNF569   | 2.54   | 3.52   |
|         |        |          |        | ZNF410   | 2.41   | 3.43   |
|         |        |          |        | KLF8     | 2.39   | 2.62   |
|         |        |          |        | ARID3A   | 2.31   | 2.54   |
|         |        |          |        | KLF11    | 2.27   | 2.90   |
|         |        |          |        | STAT5B   | 2.06   | 2.73   |
|         |        |          |        | SKOR2    | 2.04   | 3.44   |

**Supplementary Figure 1. *Mtb* SP-unique, CP-unique and SP-CP-common interactors screened on human proteome microarray. (A) *Mtb* SP-unique interactors (green), (B) *Mtb* CP-unique interactors (red) and (C) *Mtb* SP-CP-common interactors were showed with their  $SNR \geq 2.0$ . The colors shades represent the numerical value.**

| Protein | Image                                                                             | SNR532 | Image                                                                              | SNR647 |
|---------|-----------------------------------------------------------------------------------|--------|------------------------------------------------------------------------------------|--------|
| NRF1    |  | 6.53   |  | 8.98   |
| SMAD2   |  | 4.24   |  | 5.90   |

**Supplementary Figure 2. NRF1 and SMAD2 are potential *Mtb* interactors.** Potential *Mtb* interactors NRF1 and SMAD2 were set as representative proteins for further study. The SNR and images were shown. Experiments were performed in two replicates.

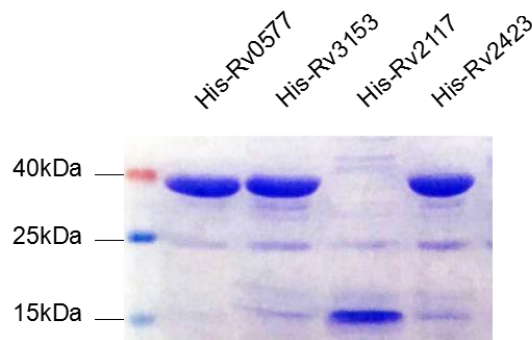

**Supplementary Figure 3. Purification of His tagged Rv0577, Rv3153, Rv2117 and Rv2423.** His tagged *Mtb* proteins were purified and detected by SDS-PAGE followed by coomassie brilliant blue staining.

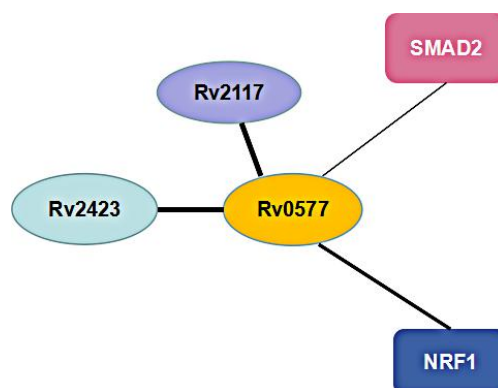

**Supplementary Figure 4. PPI based on the experimental validation.** Network plot was visualized by Cytoscape software. Nodes depict proteins (rectangle: human proteins, ellipse: *Mtb* proteins ) by various colors and edges represent interactions.

## 1.2 Supplementary Tables

**Table S1 The host interacting proteins with *Mtb* that have been identified from previous studies.**

| Host Protein Name | Mtb binding partners    | Uniprot ID    | Method                             | Reference                                     |
|-------------------|-------------------------|---------------|------------------------------------|-----------------------------------------------|
| TRIM27            | PtpA                    | P14373        | Y2H                                | Wang J. et al., 2016, <i>Sci Rep</i>          |
| IL8               | Rv3248c,Rv0296c,Rv1018c | P10145        | AP/MS                              | Wang J.et al., 2015, <i>Nat Immunol</i>       |
| Ub                | PtpA                    |               | Y2H                                | Dziadek B.et al., 2016, <i>Plos One</i>       |
| $\beta$ 2M        | ESAT-6                  | P61769        | Y2H                                | Sreejit G. et al., 2014, <i>Plos Pathog</i>   |
| Hrs               | EsxH,EsxG               | O14964        | Y2H                                | Mehra A.et al., 2013, <i>Plos Pathog</i>      |
| DUSP16<br>/MKP-7  | Eis                     | Q9BY84        | acetylation assays <i>in vitro</i> | Kim K.H.et al., 2012, <i>PNAS</i>             |
| TLR2              | Rv0577                  | O60603        | Pulldown                           | Byun E.H.et al., 2012, <i>FASEB J</i>         |
| V-ATPase          | PtpA                    | Q15904        | Pulldown                           | Wong D.et al., 2011, <i>PNAS</i>              |
| Rab5/Rab7         | NdkA                    | P20339/P51149 | Pulldown                           | Sun J.et al., 2010, <i>Plos One</i>           |
| ALO17             | Rv3655c                 | Q63HN8        | Pulldown                           | Danelishvili L.et al., 2010, <i>Plos One</i>  |
| PSF               | Rv3654c                 | P23246        | Pulldown                           | Danelishvili L.et al., 2010, <i>Plos One</i>  |
| VPS33B            | PtpA                    | Q9H267        | substrate trapping                 | Bach H.et al., 2008, <i>Cell Host Microbe</i> |
| Coronin-1A        | LpdC                    | P31146        | Pulldown and 2D-gel                | Deghmane A-E.et al., 2007, <i>J Cell Sci</i>  |
| PI3P              | SapM                    | Q13496        | phosphatase assay <i>in vitro</i>  | Vergne I.et al., 2005, <i>PNAS</i>            |

Complement C3      HbhA      P01024      AP/MS      Mueller-Ortiz S.L. et al., 2001, *Infect Immun*

---

**Table S2 Top twenty IPA pathways for *Mtb* interactors**

| <b>Ingenuity Canonical Pathways</b>                                  | <b>-log(p-value)</b> | <b>Ratio</b> | <b>Molecules</b>                |
|----------------------------------------------------------------------|----------------------|--------------|---------------------------------|
| TGF- $\beta$ Signaling                                               | 3.47                 | 0.046        | SMAD2,MAPK3,SMAD4,HNF4A         |
| Transcriptional Regulatory Network in Embryonic Stem Cells           | 2.94                 | 0.0556       | CDX2,HNF4A,FOXD3                |
| Role of NANOG in Mammalian Embryonic Stem Cell Pluripotency          | 2.92                 | 0.0328       | MAPK3,CDX2,SMAD4,FOXD3          |
| Osteoarthritis Pathway                                               | 2.89                 | 0.0236       | SMAD2,GLIS2,PPARD,SMAD4,SLC39A8 |
| Melatonin Signaling                                                  | 2.59                 | 0.0417       | RORA,MAPK3,MAP2K5               |
| Ephrin B Signaling                                                   | 2.57                 | 0.0411       | MAPK3,ACP1,GNB1L                |
| Regulation of IL-2 Expression in Activated and Anergic T Lymphocytes | 2.46                 | 0.0375       | SMAD2,MAPK3,SMAD4               |
| IL-22 Signaling                                                      | 2.43                 | 0.0833       | MAPK3,STAT5B                    |
| Role of JAK family kinases in IL-6-type Cytokine Signaling           | 2.39                 | 0.08         | MAPK3,STAT5B                    |
| Antiproliferative Role of TOB in T Cell Signaling                    | 2.36                 | 0.0769       | SMAD2,SMAD4                     |
| PPAR $\alpha$ /RXR $\alpha$ Activation                               | 2.31                 | 0.0222       | SMAD2,MAPK3,SMAD4,STAT5B        |
| Sirtuin Signaling Pathway                                            | 2.29                 | 0.0171       | PCK2,MAPK3,NDUFB6,LDHA,NFE2L2   |

|                                                             |      |        |                               |
|-------------------------------------------------------------|------|--------|-------------------------------|
| Acute Myeloid Leukemia Signaling                            | 2.27 | 0.0323 | MAPK3,STAT5B,MAP2K5           |
| PPAR Signaling                                              | 2.25 | 0.0316 | PPARD,MAPK3,STAT5B            |
| Regulation of the Epithelial-Mesenchymal Transition Pathway | 2.23 | 0.0212 | SMAD2,MAPK3,SMAD4,MAP2K5      |
| Oncostatin M Signaling                                      | 2.13 | 0.0588 | MAPK3,STAT5B                  |
| DNA Methylation and Transcriptional Repression Signaling    | 2.13 | 0.0588 | MTA2,MBD2                     |
| Chronic Myeloid Leukemia Signaling                          | 2.12 | 0.0283 | MAPK3,SMAD4,STAT5B            |
| Mouse Embryonic Stem Cell Pluripotency                      | 2.12 | 0.0283 | MAPK3,SMAD4,FOXD3             |
| Glucocorticoid Receptor Signaling                           | 2.03 | 0.0147 | SMAD2,PCK2,MAPK3,SMAD4,STAT5B |

**Table S3 Top ten IPA “Diseases and Bio Functions” items for *Mtb* effectors**

| Categories      | Diseases or Functions Annotation      | p-Value  | Molecules                                                                                                                                                                                                                                     | # Molecules |
|-----------------|---------------------------------------|----------|-----------------------------------------------------------------------------------------------------------------------------------------------------------------------------------------------------------------------------------------------|-------------|
| Gene Expression | Activation of DNA endogenous promoter | 2.54E-20 | AKIRIN2,ARID3A,BARX2,CDX2,E SRRG,FOXD3,FOXM1,GLIS2,GLO1 ,GMEB2,HNF4A,HOXB4,HOXB5,H OXB9,IKZF3,IKZF4,INSM1,IRF2,KL F11,KLF8,MAP2K5,MAPK3,MBD2, MTA2,NFE2L2,NRF1,OVOL1,PPAR D,RORA,SKOR2,SMAD2,SMAD4,S OX10,SOX4,SP6,SRCAP,STAT5B,V ENTX,ZNF136 | 39          |
| Gene Expression | Transcription of DNA                  | 1.61E-19 | AKIRIN2,ARID3A,BARX2,CDX2,E SRRG,FOXD3,FOXM1,GLIS2,GLO1 ,GMEB2,HNF4A,HOXB4,HOXB5,H OXB9,IKZF3,IKZF4,INSM1,IRF2,KL F11,KLF8,MAP2K5,MAPK3,MBD2,                                                                                                 |             |

|                                                         |                                        |             |                                                                                                                                                                                                                                                         |    |
|---------------------------------------------------------|----------------------------------------|-------------|---------------------------------------------------------------------------------------------------------------------------------------------------------------------------------------------------------------------------------------------------------|----|
|                                                         |                                        |             | MTA2,NFE2L2,NRF1,OVOL1,PPARD,RORA,SKOR2,SMAD2,SMAD4,SOX10,SOX4,SP6,SRCAP,SRY,STAT5B,VENTX,ZNF136,ZNF425,ZNF540                                                                                                                                          |    |
| Gene Expression                                         | Transcription of RNA                   | 1.06E-16    | AKIRIN2,ARID3A,BARX2,CDX2,ESRRG,FOXD3,FOXM1,GLIS2,GLO1,GMEB2,HNF4A,HOXB4,HOXB5,HOXB9,IKZF3,IKZF4,INSM1,IRF2,KLF11,KLF8,MAP2K5,MAPK3,MBD2,MTA2,NFE2L2,NRF1,OVOL1,PPARD,RORA,SKOR2,SMAD2,SMAD4,SOX10,SOX4,SP6,SRCAP,SRY,STAT5B,VENTX,ZNF136,ZNF425,ZNF540 | 42 |
| Cell Death and Survival                                 | Necrosis                               | 0.000000361 | ACP1,AKIRIN2,BCL2L14,CD300LB,CDX2,FOXD3,FOXM1,GLIS2,GLO1,HNF4A,HOXB4,HOXB9,IKZF3,INSM1,IRF2,ITM2B,KLF8,LDHA,MAP2K5,MAPK3,MBTSP1,MTA2,NFE2L2,NRF1,PARVA,PCK2,PPARD,SF3B2,SGCA,SMAD2,SMAD4,SOX10,SOX4,SRCAP,STAT5B                                        | 35 |
| Gene Expression                                         | Transactivation of RNA                 | 0.000000606 | CD300LB,ESRRG,GLIS2,HNF4A,IRF2,MAPK3,NFE2L2,PARVA,PPARD,RORA,SMAD2,SMAD4,SOX10,STAT5B                                                                                                                                                                   | 14 |
| Cellular Movement                                       | Invasion of breast cancer cell lines   | 0.00000151  | BARX2,FOXM1,KLF8,LDHA,MBD2,PARVA,RORA,SMAD2,SMAD4,SOX4                                                                                                                                                                                                  | 10 |
| Cellular Movement                                       | Invasion of cells                      | 0.00000197  | BARX2,CDX2,FOXD3,FOXM1,HOXB9,KLF8,LDHA,MAP2K5,MBD2,NFE2L2,PARVA,PPARD,RFC4,RORA,SMAD2,SMAD4,SOX4,STAT5B                                                                                                                                                 | 18 |
| Embryonic Development, Organismal Development           | Patterning of rostrocaudal axis        | 0.00000073  | CDX2,HOXB4,HOXB5,HOXB9,SMAD2,SMAD4                                                                                                                                                                                                                      | 6  |
| Cellular Development, Cellular Growth and Proliferation | Cell proliferation of tumor cell lines | 0.00000074  | AKIRIN2,ARID3A,BARX2,CDX2,ESRRG,FOXD3,FOXM1,HNF4A,HOXB9,IRF2,LDHA,MAPK3,MBD2,MTA2,NFE2L2,PCK2,PPARD,RFC4,RORA,SMAD2,SMAD4,SOX4,STAT5B,V                                                                                                                 | 24 |

n

ENTX

|                               |                                   |               |                                                                                                                                                        |    |
|-------------------------------|-----------------------------------|---------------|--------------------------------------------------------------------------------------------------------------------------------------------------------|----|
| Cell Death<br>and<br>Survival | Cell death of tumor cell<br>lines | 0.000010<br>7 | BCL2L14,CDX2,FOXD3,FOXM1,GL<br>O1,HNF4A,HOXB9,IRF2,KLF8,MAP<br>2K5,MAPK3,MTA2,NFE2L2,NRF1,P<br>ARVA,PCK2,PPARD,SMAD2,SMA<br>D4,SOX10,SOX4,SRCAP,STAT5B | 23 |
|-------------------------------|-----------------------------------|---------------|--------------------------------------------------------------------------------------------------------------------------------------------------------|----|

---



**Table S4 Top three networks in diseases and functions for *Mtb* interactors**

| Top network functions                                                                    | Score | Focus Molecules                                                                                      |
|------------------------------------------------------------------------------------------|-------|------------------------------------------------------------------------------------------------------|
| Gene Expression, Embryonic Development, Organismal Development                           | 32    | AKIRIN2,CDX2,BCL2L14,CYP39A1,FOXD3,HOXB4,HOXB9,MAP2K5,NFE2L2,PCK2,RORA,SF3B2,SKOR2,SMAD2,SMAD4,SRCAP |
| Cellular Assembly and Organization, Endocrine System Disorders, Gastrointestinal Disease | 32    | ACP1,DDX39B,GLO1,GNB1L,HNF4A,KLF11,LAPT M4A,NDUFB6,NRF1,OVOL1,PARVA,SOX4,SOX10,STAT5B,ZNF410,ZNF557  |
| Gene Expression, Carbohydrate Metabolism, Small Molecule Biochemistry                    | 27    | ARID3A,ESRRG,FOX M1,IKZF3,IKZF4,INSM1,IRF2,KAT14,LDHA,MAPK3,MBD2,MTA2,PPARD,VPS8                     |

**Table S5 Top five tox functions list for *Mtb* interactors identified**

| Name                                                              | p-value  | overlap     |
|-------------------------------------------------------------------|----------|-------------|
| TGF- Signaling                                                    | 3.84E-04 | 4.4 % 4/90  |
| Liver Proliferation                                               | 2.13E-03 | 2.1 % 5/238 |
| Renal Necrosis/Cell Death                                         | 4.84E-03 | 1.3 % 7/549 |
| PPAR/RXR Activation                                               | 5.20E-03 | 2.2 % 4/183 |
| Mechanism of Gene Regulation by Peroxisome Proliferators via PPAR | 5.67E-03 | 3.2 % 3/95  |

### 1.3 Supplementary Original Figures

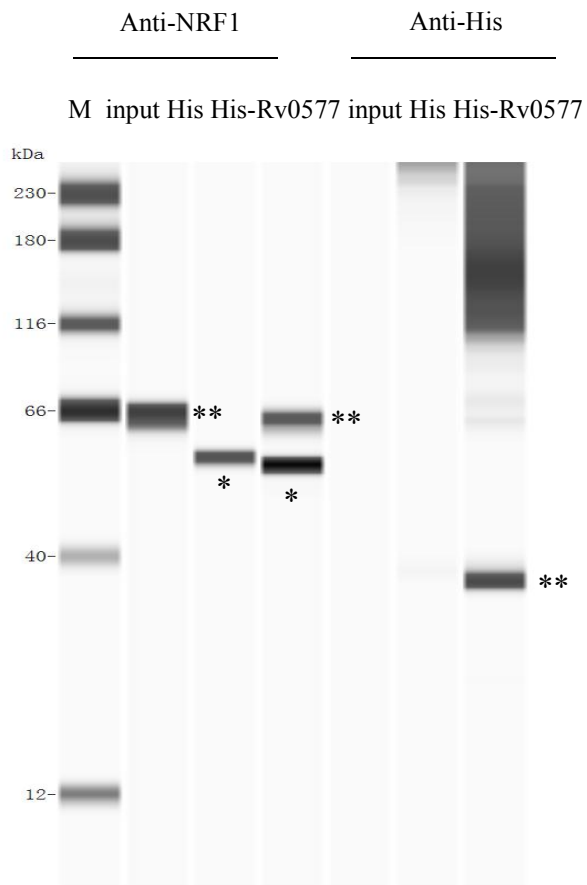

**Supplementary Original Figure 1. His pull-down of His-Rv0577 with endogenous NRF1. \*\* represented specific band, \* represented non-specific band**

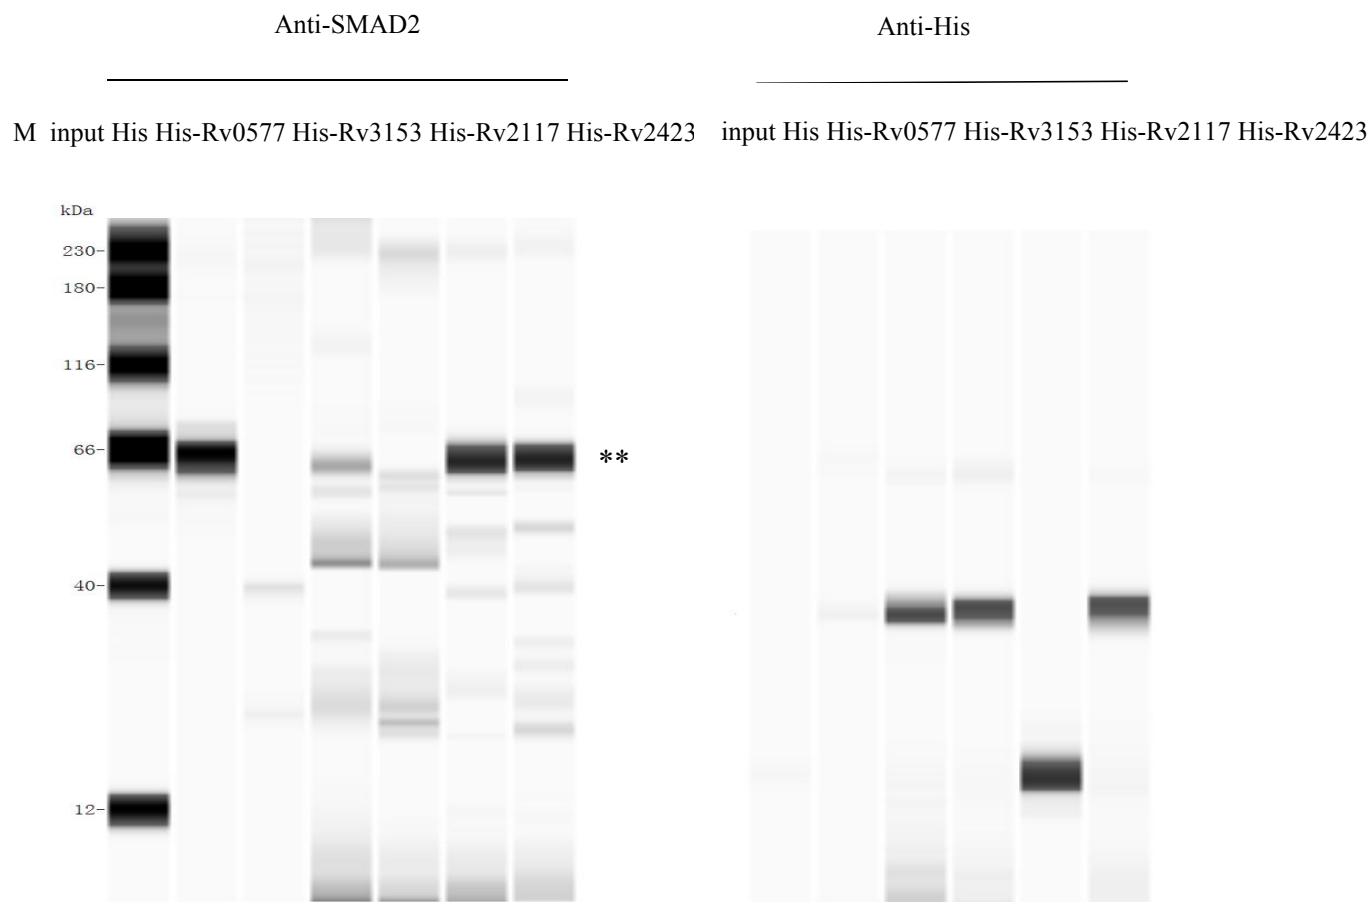

**Supplementary Original Figure 2. His pull-down of His-Rv0577, His-Rv3153, His-Rv2117 and His-Rv2423 with endogenous SMAD2. \*\* represented specific band**

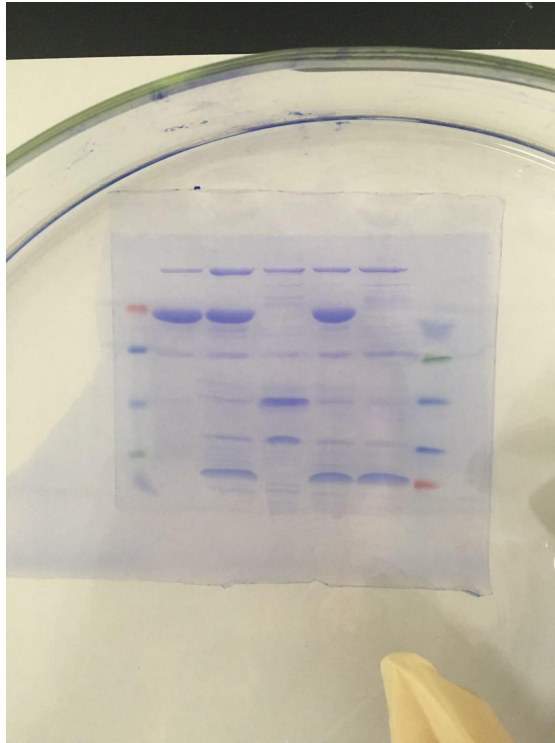

**Supplementary Original Figure 3. Purification of His tagged Rv0577, Rv3153, Rv2117 and Rv2423.**
